# Supplementary material
Source: PubMed Central journal article supplement (PMC1976209)
Supplement: pnas_0706701104_8.pdf [file pnas_0706701104_8.pdf]

|            |       |                                                              |
|------------|-------|--------------------------------------------------------------|
| GFP (S65T) | (400) | <u>GA</u> CGGCAACATCCTGGGGCACAAGCTGGAGTACAACACTACAACAGCCACAA |
| 5' RACE-1  | + 37  | -----ACAACAGCCACAA                                           |
| 5' RACE-2  | + 40  | -----ACAGCCACAA                                              |
| 5' RACE-3  | + 49  | -----A                                                       |
| 5' RACE-4  | + 52  | -----                                                        |
| 5' RACE-5  | + 52  | -----                                                        |
| 5' RACE-6  | + 52  | -----                                                        |
| 5' RACE-7  | + 52  | -----                                                        |
| 5' RACE-8  | + 52  | -----                                                        |
| 5' RACE-9  | + 58  | -----                                                        |
| 5' RACE-10 | + 79  | -----                                                        |

|            |       |                                                    |
|------------|-------|----------------------------------------------------|
| GFP (S65T) | (450) | CGTCTATATCATGGCCGACAAGCAGAAGAACGGCATCAAGGTGAACTTCA |
| 5' RACE-1  | + 37  | CGTCTATATCATGGCCGACAAGCAGAAGAACGGCATCAAGGTGAACTTCA |
| 5' RACE-2  | + 40  | CGTCTATATCATGGCCGACAAGCAGAAGAACGGCATCAAGGTGAACTTCA |
| 5' RACE-3  | + 49  | CGTCTATATCATGGCCGACAAGCAGAAGAACGGCATCAAGGTGAACTTCA |
| 5' RACE-4  | + 52  | --TCTATATCATGGCCGACAAGCAGAAGAACGGCATCAAGGTGAACTTCA |
| 5' RACE-5  | + 52  | --TCTATATCATGGCCGACAAGCAGAAGAACGGCATCAAGGTGAACTTCA |
| 5' RACE-6  | + 52  | --TCTATATCATGGCCGACAAGCAGAAGAACGGCATCAAGGTGAACTTCA |
| 5' RACE-7  | + 52  | --TCTATATCATGGCCGACAAGCAGAAGAACGGCATCAAGGTGAACTTCA |
| 5' RACE-8  | + 52  | --TCTATATCATGGCCGACAAGCAGAAGAACGGCATCAAGGTGAACTTCA |
| 5' RACE-9  | + 58  | -----TCATGGCCGACAAGCAGAAGAACGGCATCAAGGTGAACTTCA    |
| 5' RACE-10 | + 79  | -----ACGGCATCAAGGTGAACTTCA                         |
