# Supplementary material
Source: PubMed Central journal article supplement (PMC1976209)

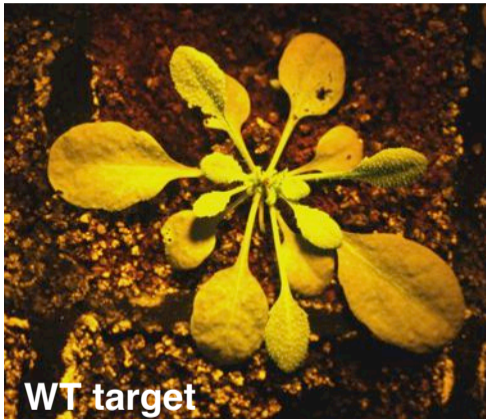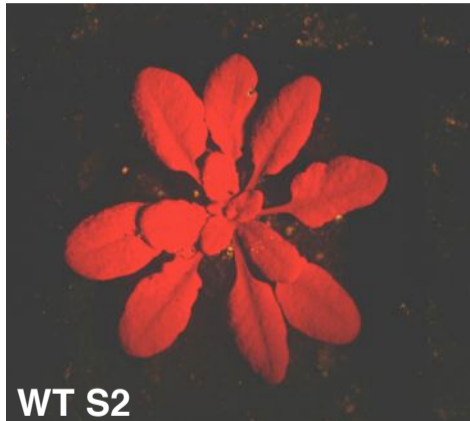

Supplement: pnas_0706701104_1.pdf [file pnas_0706701104_1.pdf]

**a**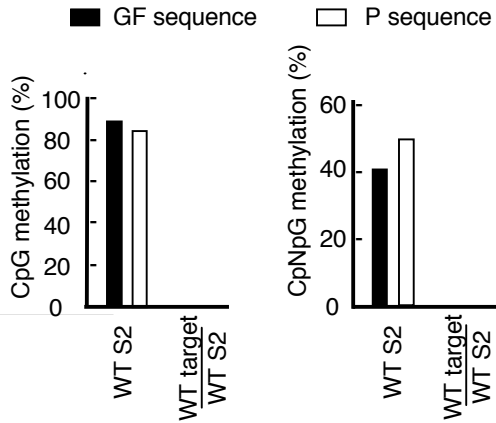**b**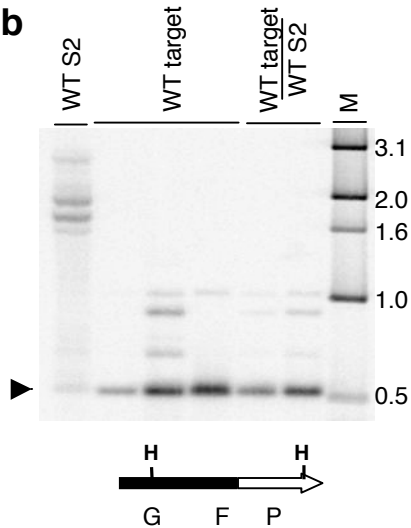

Supplement: pnas_0706701104_2.pdf [file pnas_0706701104_2.pdf]

**a**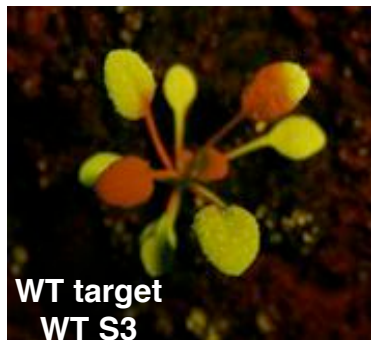**b**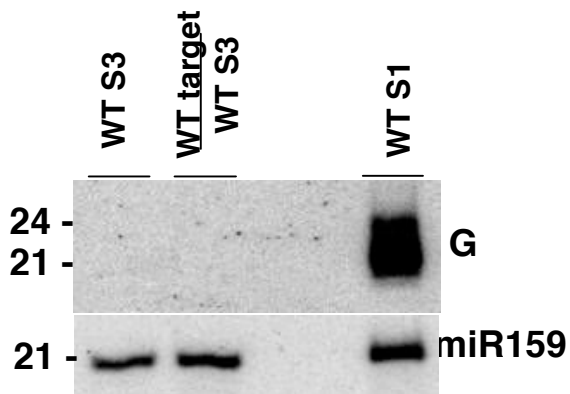**c**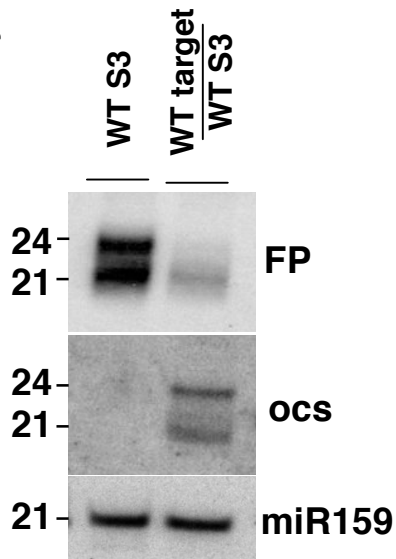

Supplement: pnas_0706701104_3.pdf [file pnas_0706701104_3.pdf]

**a**

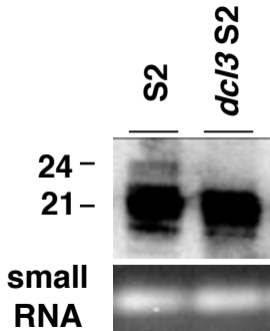

**b**

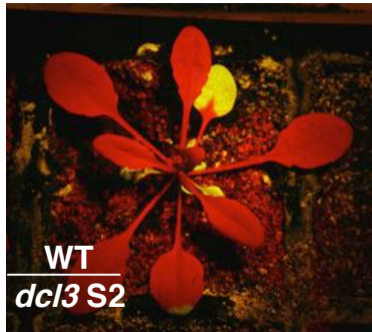

Supplement: pnas_0706701104_4.pdf [file pnas_0706701104_4.pdf]

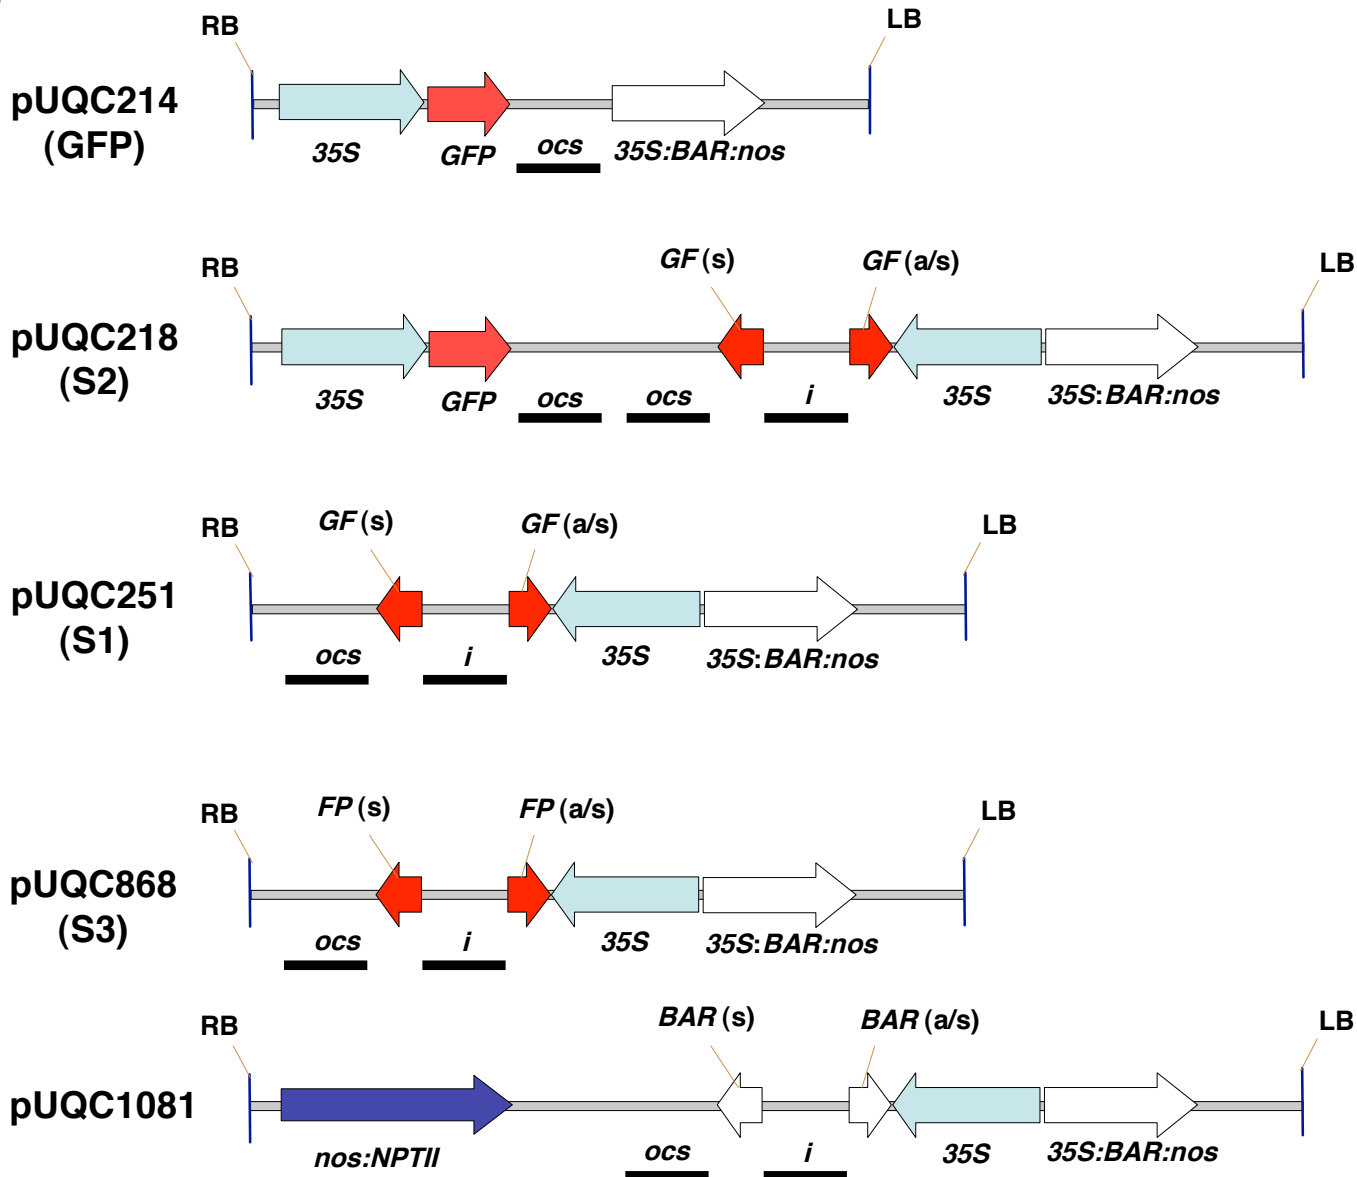

Supplement: pnas_0706701104_5.pdf [file pnas_0706701104_5.pdf]

**a**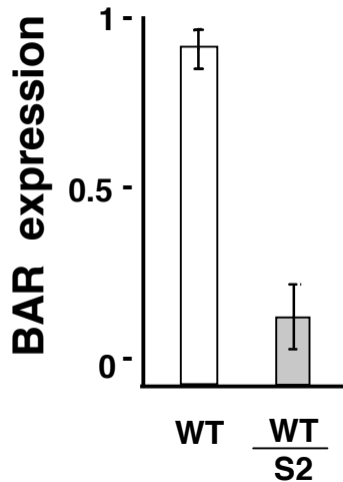**b**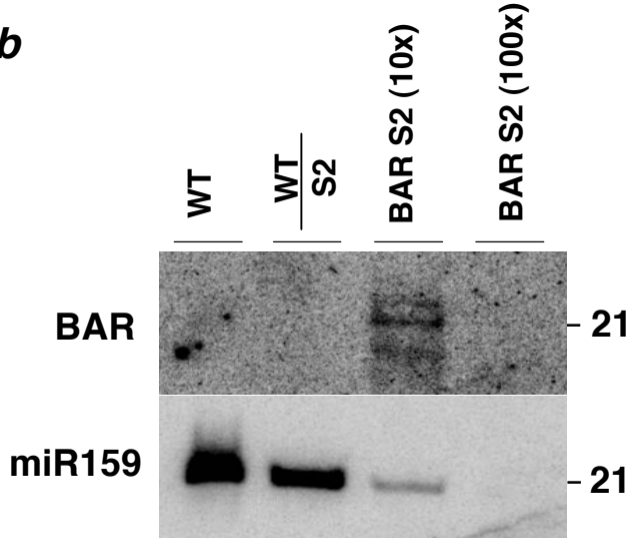

Supplement: pnas_0706701104_6.pdf [file pnas_0706701104_6.pdf]

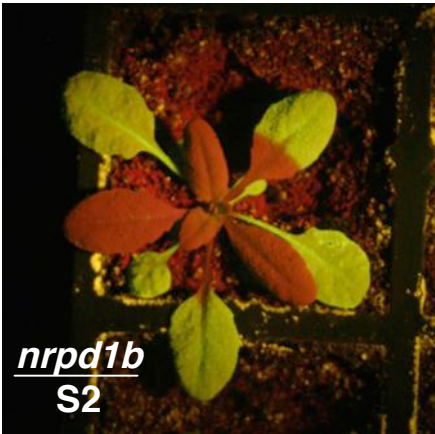

*nrpd1b*  
S2

Supplement: pnas_0706701104_7.pdf [file pnas_0706701104_7.pdf]
